# Supplementary material for: Voltage-Gated Ion Channels in Human Pancreatic β-Cells: Electrophysiological Characterization and Role in Insulin Secretion
Source: Oxford University Press journal article supplement (doi:10.2337/db07-0991), 2008-04-05
Supplement: db070991-sup-braun_suppl_fig_1.doc [file db070991-sup-braun_suppl_fig_1.doc]

**Supplemental Figure 1.** Distribution of whole-cell capacitance values (Cslow) for -cells (red), -cells (green) and -cells (blue) identified by immunocytochemistry after patch-clamp experiments. The average capacitance was 9.9±0.3 pF for-cells (n=207), 3.8±0.3 pF for -cells (n=62) and 4.6±0.3 pF for -cells (n=33). The size distribution of -cells is compatible with two distinct cell populations. The nature of these populations is unclear, although isolated cells tended to be smaller (8.7±0.7 pF) than cells within cell clusters (11.9±0.5 pF; *P*<0.001).
