# Supplementary material for: Voltage-Gated Ion Channels in Human Pancreatic β-Cells: Electrophysiological Characterization and Role in Insulin Secretion
Source: Oxford University Press journal article supplement (doi:10.2337/db07-0991), 2008-04-05
Supplement: db070991-sup-braun_suppl_fig_2.doc [file db070991-sup-braun_suppl_fig_2.doc]

**
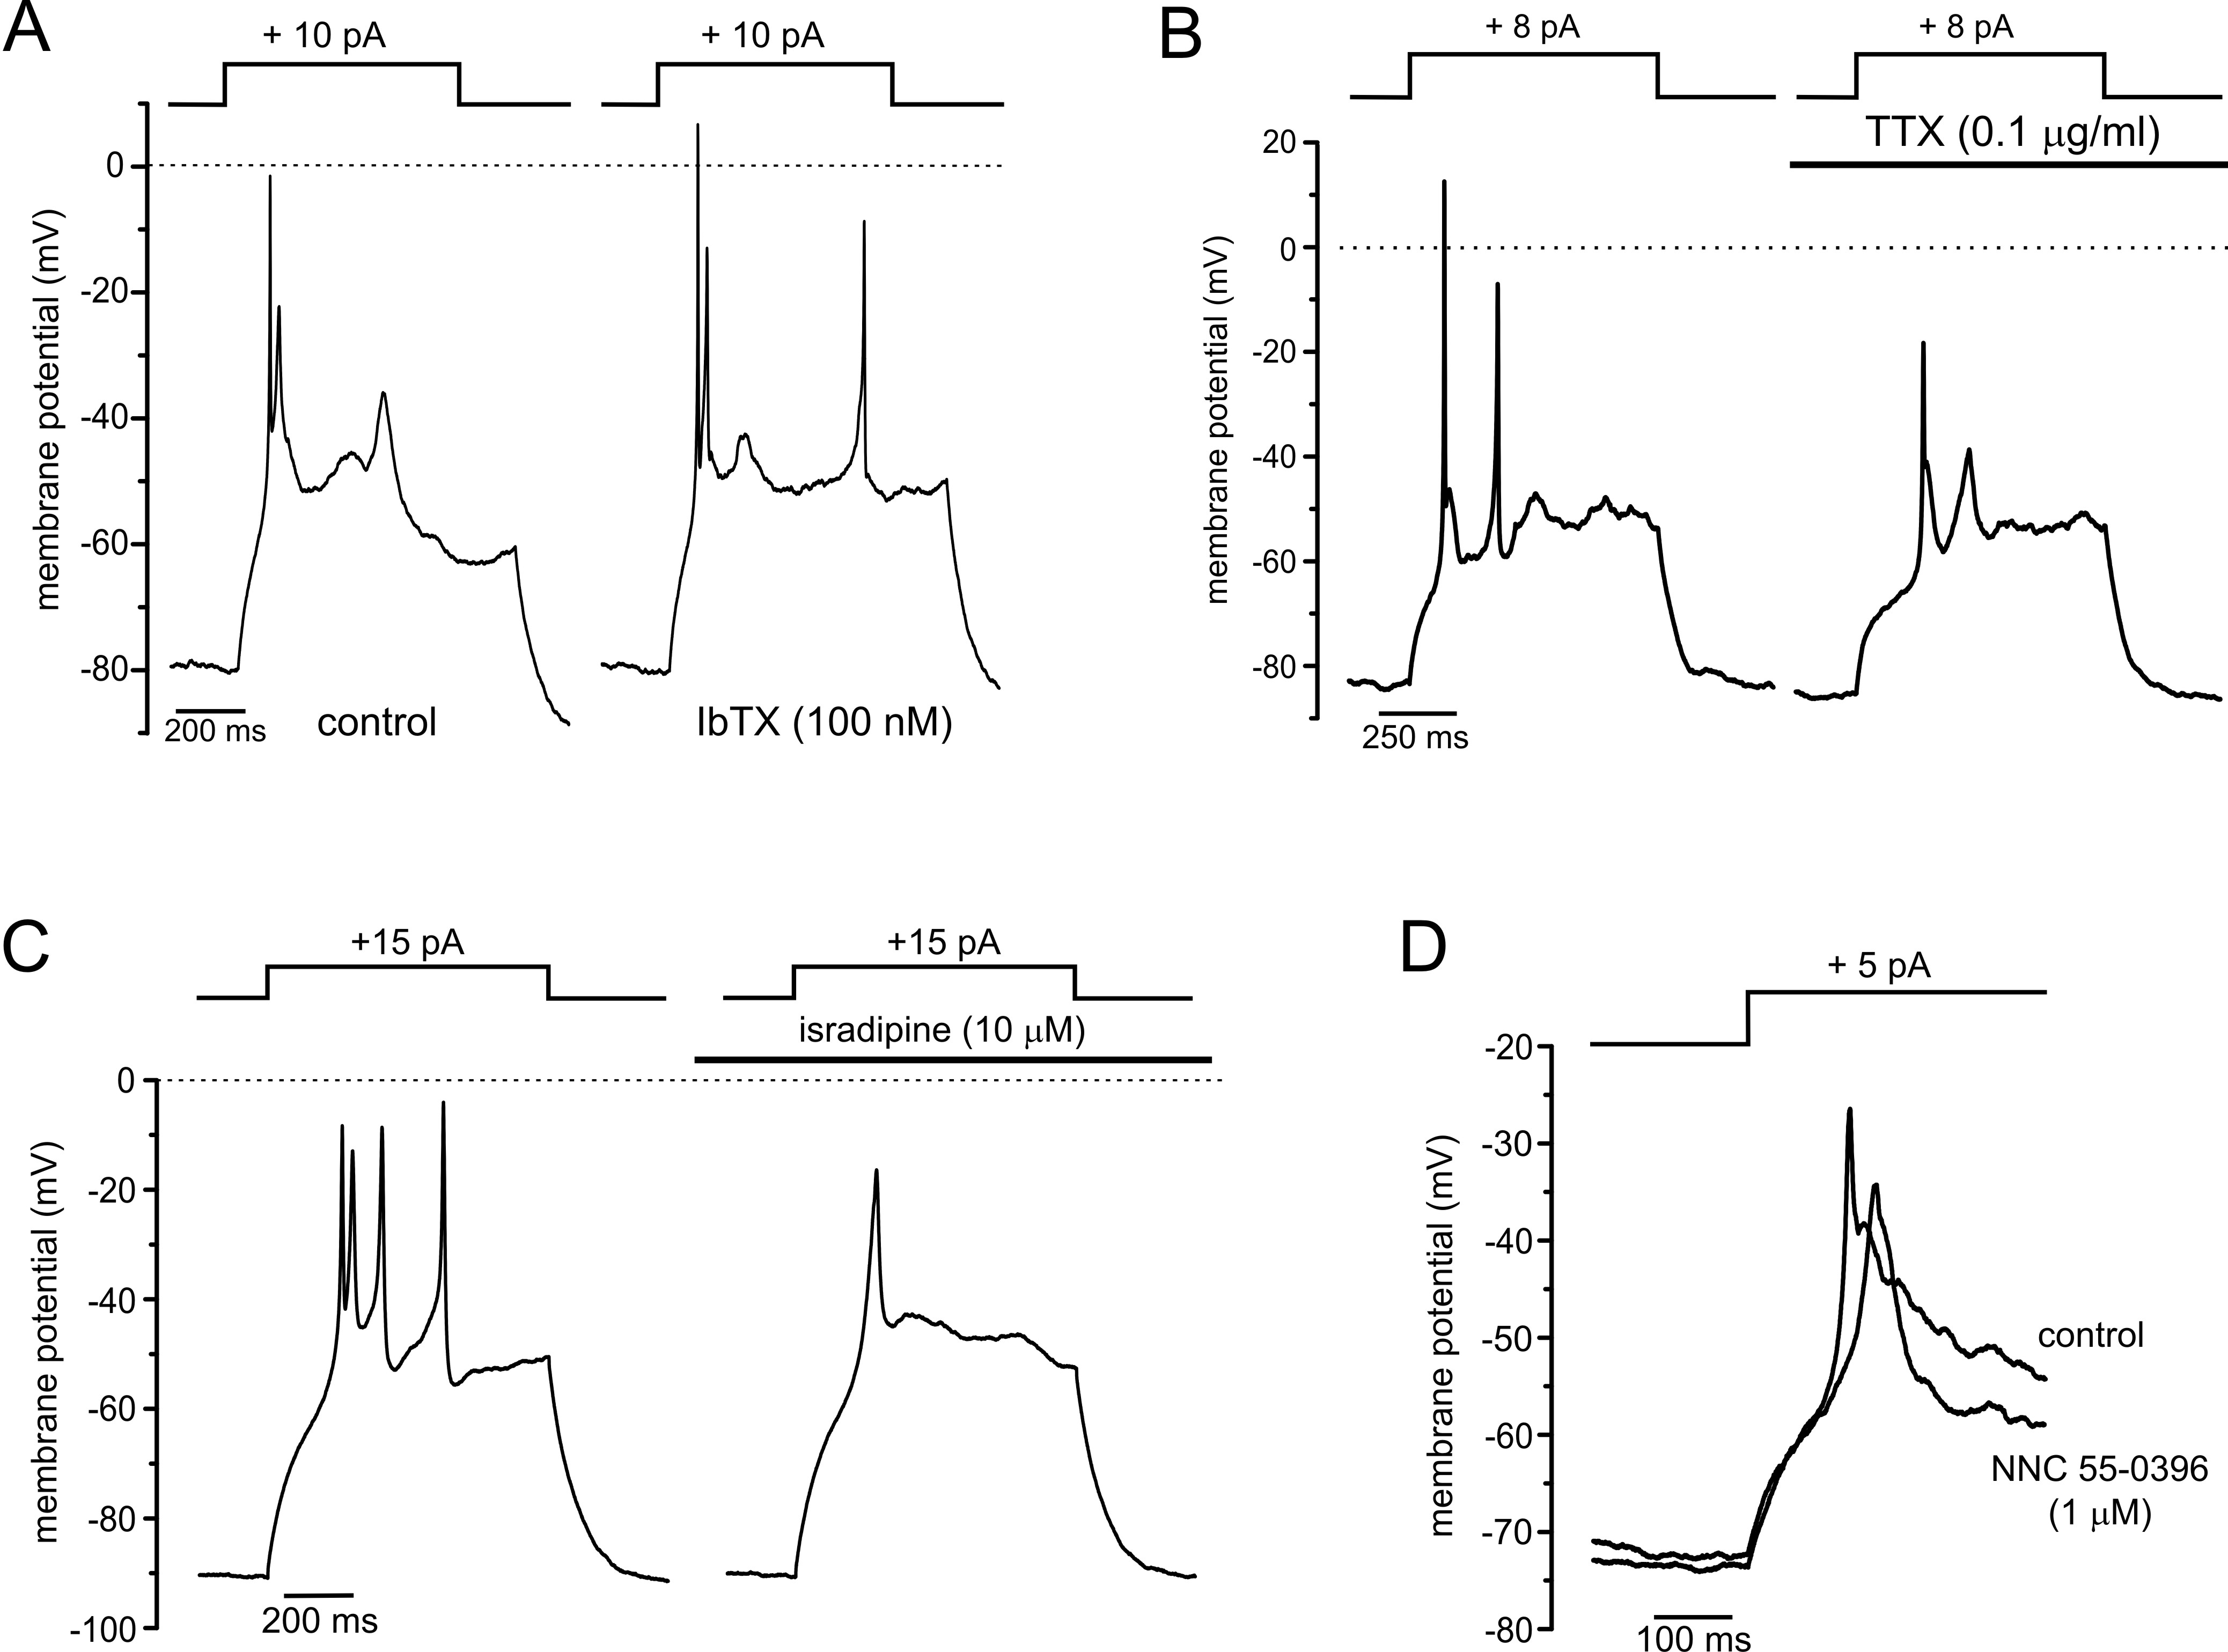
**

**Supplemental Figure 2: Effects of ion channel blockers on action potentials elicited by current injection.**

**A)** Effect of IbTX. IbTX increased action potential peak amplitude from -12±5 to -3±7 mV (p<0.01, n=6). **B)** Effect of TTX. Action potentials peaked at 1±3 and -16±1 mV before and after addition of TTX, respectively (p<0.001, n=11). **C)** Effect of isradipine. While under control conditions current injections triggered 2.1±0.5 action potentials, after addition of isradipine the same protocol consistently elicited only a single initial action potential (1±0, p<0.05, n=5). Action potential peaked at ‑8±5 and -19±6 mV (p<0.05) in the absence and presence of isradipine. **D)** Effect of NNC 55-0936. The blocker affected electrical activity in 3 out of 6 cells tested. In these cells, the peak voltage was decreased from ‑8±5 mV to -31±4 mV (Fig. 5E).

The experiments were performed in the standard whole-cell configuration. Current was injected to hyperpolarize the cells -80 to -90 mV. An 800 ms current pulse of sufficient amplitude to trigger electrical activity was subsequently applied. The intracellular solution contained (in mM) 120 KCl, 1 MgCl2, 10 EGTA, 1 CaCl2, 10 HEPES and 3 MgATP (pH 7.2, adjusted with KOH), and the bath solution was composed of (mM) 138 NaCl, 5.6 KCl, 2.6 CaCl2, 1.2 MgCl2, 5 HEPES and 10 glucose (pH 7.4, adjusted with NaOH).
