# Supplementary material for: Voltage-Gated Ion Channels in Human Pancreatic β-Cells: Electrophysiological Characterization and Role in Insulin Secretion
Source: Oxford University Press journal article supplement (doi:10.2337/db07-0991), 2008-04-05
Supplement: db070991-sup-braun_suppl_methods.doc [file db070991-sup-braun_suppl_methods.doc]

**Online supplemental Methods (Braun et al.)**

*Electrophysiology*

Patch-clamp experiments were performed using an EPC-9 amplifier and Pulse software (version 8.53, HEKA, Lamprecht, Germany). Patch pipettes were pulled from borosilicate glass and fire-polished (tip resistance 4-8 M when filled with pipette solution). Experiments were conducted in the standard or perforated-patch whole-cell configuration. In the perforated-patch configuration, electrical contact was established by inclusion of 0.24 mg/ml amphotericin B in the pipette solution. The cells were constantly perifused with extracellular solution heated to 32-33°C. Where appropriate, leak currents were subtracted using a P/4-protocol. The islet cell type was determined post-experimentally by immunocytochemistry.

Exocytosis was detected as changes in cell capacitance, which was estimated by the Lindau-Neher technique implementing the “Sine + dc” feature of the Pulse lock-in module. The sinewave frequency was 500 Hz and the amplitude 20 mV.

*Immunocytochemistry*

After patch-clamping, the location of the cell was marked in the Petri dish. The cells were subsequently fixed in 4% paraformaldehyde for 10 min and stored in PBS at 4°C until further processing. Following permeabilization in PBS containing 0.1% Triton X-100 and 5% goat serum for 15 min, the cells were incubated overnight at 4°C with primary antibodies against islet hormones (guinea pig anti-insulin 1:100 (Abcam, Cambridge, UK), mouse anti-glucagon (1:2000, Sigma) and rabbit anti-somatostatin (1:100, Vectorlabs, Burlingname, CA)), which were dissolved in PBS containing 5% goat serum. After washing with PBS, fluorescence-labelled secondary antibodies (anti-guinea pig Alexa-633, anti-mouse Alexa-405 and anti-rabbit Alexa-488, all from Invitrogen) were added (dilution 1:500 in PBS containing 5% goat serum) and incubated for 1 h at room temperature. For detection of biocytin, the cells were additionally incubated with Alexa Fluor 546-labelled streptavidin (Invitrogen, 1:1000 in PBS) for 15 min at room temperature. Fluorescence was visualized using a Zeiss Axioskop 2 upright microscope equipped with LSM 510 Meta confocal and Chameleon multiphoton modules.

### *Quantitative RT-PCR of human islet mRNA*

Total RNA was purified from 100-200 human islets using RNeasy Mini kit (Qiagen) followed by DNase digestion (RQ1 DNase, Promega). RNA samples were subsequently quantified using a Nanodrop (Nanodrop Technologies) spectrophotometer. A260/280 ratios were 1.99-2.09. 20 μl reverse transcription reactions containing 0.5 mM dNTP, 2 μM oligo(dT), 2 μM random hexamers (all Applied Biosystems) and 1–4 μg of total RNA were incubated at 65°C for 5 min, followed by addition of 1X First-Strand buffer, 5 mM DTT, 20 U RNaseOUT RNase inhbitor and 200 U SuperScript III (all Invitrogen). Final concentrations are shown. Samples were incubated at 25 °C for 5 min, followed by 50°C for 1 hr. All RT-reactions were run in duplicate and were diluted 1:50 prior PCR. Quantitative real-time PCR was performed in Applied Biosystems 7900HT in 10 µl reactions containing 4 μl cDNA sample, 1X SYBR Green JumpStart Taq ReadyMix, 2X Reference dye for qPCR (both Sigma) and 0.2 μM forward and reverse oligonucleotide primers (Invitrogen). With sequences from Ensembl release 45 (June 2007), intron-spanning primers were designed with Primer3Plus (http://www.bioinformatics.nl/cgi-bin/primer3plus/primer3plus.cgi) and PCR products were 70-177 bp long. Specificity was confirmed by reverse ePCR (NCBI). Primer sequences are shown in Table M1 (next page). PCR efficiencies (E) were estimated by dilution of cDNA and by LinRegPCR (Ramakers C (2003), Neurosci Lett 339:62), and found to be 80-100% in all cases, and used in the estimation of expression level (N) using the formula: N (arb. units) = (1+E)^(40-Ct) where Ct is the cycle threshold value. Constant reverse transcription efficiencies and fluorescent signal to amplicon copy number ratios for all assays are assumed. All data were normalized to the geometric mean of HPRT and RS29 expression levels.

**Table M1**: PCR primer sequences

| **Gene ID** | **Forward primer** | **Reverse primer** | **Amplicon length (bp)** |
| --- | --- | --- | --- |
| SCN1A | GTCATTCATAAACAACCCCAGTC | TCTGATGAGCTACTGCTTTCATTC | 150 |
| SCN2A | GCGAGTCAGATATGGAGGAAAG | AACAGGCTTCAGGTTCAAGG | 141 |
| SCN3A | TTCACTAATGCCTGGTGCTG | CCGAGTTCTGAGTAGCCAAGAG | 92 |
| SCN4A | CATGTGCCTCACCGTCTTC | AGGTTGTTCATCTCGCCATC | 138 |
| SCN5A | GGTTCGAGACATTCATCATCTTC | GATGGTCTTCCGCTCCTC | 89 |
| SNC8A | AGCACCATCCTATGACACCAC | TGGCTATGAGCTTCAGGAAC | 102 |
| SCN9A | TCATCTTTGGGTCATTCTTCAC | ACCCCAGCTTTTTCATTGC | 144 |
| SCN10A | AAGAAGGGAAGCCTGTCTGTG | GCCAGGATGATGGTGAGG | 143 |
| SCN11A | AAAACCTCAAAAACCCATTCC | GCTTGTGACTATGTCGAACACG | 70 |
| SCN1B | GTCTACCGCCTGCTCTTCTTC | TGGATGCCATGTCTCTGTTG | 103 |
| SCN2B | GGGGCTCAGTCTCTTTTTCTC | TGTGTAGCAGGAGTTGAAGGTG | 127 |
| SCN3B | ATTGTTTCCCCTGGCTTCTC | AGGGCACTTCCACACACAC | 74 |
| SCN4B | GGGGACGGAGGCAAAG | TTACGGGGAGCAGGAAGAG | 70 |
| CACNA1A | ATCGTCTTCACCTCCCTCTTC | GCCCAGAACAGTCACAAAGTC | 114 |
| CACNA1B | TTGCCTACTTCTACTTCGTCTCC | TCACAGCCACAAAGAGGTTC | 72 |
| CACNA1C | AACAAGGACTGGTGGGAAAG | TGCAAATCACACGATATAGCAC | 148 |
| CACNA1D | TTTGACTGCTTCGTCGTGTG | GGTTGCTCAAGGAGTTCCAG | 118 |
| CACNA1E | TCCAGTTGGCTTGTATGGAC | AACGTCTCATGGAGCTAGGG | 91 |
| CACNA1F | CACCTCCAGTCAGCCCAGT | TCTTGCTTGTTTTGCCCTTT | 132 |
| CACNA1G | GGGCATCGAATACCACGA | GCAAAGAGGCTGGTGAAGAC | 81 |
| CACNA1H | TCAACGTCATCACCATGTCC | GCCTCGAAGACAAACACGA | 106 |
| CACNA1I | GTACTTCAACCGGGGCATC | ATCATCTCCAGGGCAAACA | 144 |
| KCNMA1 | TCACGCAGCCCTTTGC | CCGTATCAGGGTGAGGATATTG | 101 |
| KCNMB1 | GAGCTGAAGGGCAAGAAGG | GCTGCCTGGGATGTAGGAG | 135 |
| KCNMB2 | GCTCCTCCTCTACCACACAGA | GACAACATTCACCAGGGACA | 109 |
| KCNMB3 | GGGCTTCTCAGTCCTAATGTTC | AGTGCAGGTCGATTCTTCTCTC | 91 |
| KCNMB4 | GATTGGTTCCCAGCCATTTAC | AATGAGAACGCCCACCAC | 142 |
| KCNB1 | AGGCGAGGAGTTCGATAACA | ATGGTGGAGAGGACGATGAA | 135 |
| KCNB2 | CGAGAGCGAGAAGGAGAAGA | TGGAAAGCACAATGAACAGG | 142 |
| KCNC1 | GCATCTGGGCGCTCTTC | CTTGTTCACGATGGGGTTG | 140 |
| KCNC2 | TGGCCGCTGGAGGAG | CCAGGATGAAGAATAAAGAAGCA | 107 |
| KCNG1 | GTCAACCTCTCCGTCAGCA | GCACATCTGGGAACAGTGG | 72 |
| KCNG2 | GTGGACAACCCGCACTC | GCACACGGTCTCCAGCA | 177 |
| KCNS2 | GCGGGTTGGGGAAGTTT | ACGTTAGCCTCCGACACG | 136 |
| KCNS3 | GTGTGCTGAGAAGGGCAGA | TGGTGGATACAGAAGGCAGA | 150 |
| KCND1 | GCCTGCTGTCTTCTTGCTG | TTGGCATTGAGGCTGGA | 160 |
| KCND2 | TCTTGCTTTTCTCGCTCACC | TTGGCACCATGTCACCATAC | 159 |
| KCND3 | TAGCCGGATTTACCACCAGA | CCGTTGCGCTTGCTGT | 126 |
| KCNA4 | GGATCATTCTTCCCCTCCTC | AGCATTCTTCAGCCAAAATCA | 140 |
| RS29 | GCCAGGGTTCTCGCTCTT | CGCGTACTGACGGAAACAC | 98 |
| HPRT | CTTTGCTGACCTGCTGGATT | TTATGTCCCCTGTTGACTGGT | 122 |
