# Supplementary material for: Voltage-Gated Ion Channels in Human Pancreatic β-Cells: Electrophysiological Characterization and Role in Insulin Secretion
Source: Oxford University Press journal article supplement (doi:10.2337/db07-0991), 2008-04-05
Supplement: db070991-sup-braun_suppl_table_1.doc [file db070991-sup-braun_suppl_table_1.doc]

### Supplemental Table 1. mRNA expression levels of voltage gated ion channels in human pancreatic islets

| Gene ID | Protein ID | Expression level (AU) ± SE (n=4) | Fraction (%)1 |
| --- | --- | --- | --- |
| *Voltage gated Na+-channel, α-subunit* | |  |  |
| SCN1A | Nav1.1 | 0 | 0 |
| SCN2A | Nav1.2 | 58 ± 15 | 1 |
| SCN3A | Nav1.3 | 73 ± 10 | 2 |
| SCN4A | Nav1.4 | 68 ± 30 | 2 |
| SCN5A | Nav1.5 | 8 ± 2 | 0 |
| SNC8A | Nav1.6 | 2500 ± 530 | 60 |
| SCN9A | Nav1.7 | 1400 ± 270 | 35 |
| SCN10A | Nav1.8 | 0 | 0 |
| SCN11A | Nav1.9 | 27 ± 10 | 1 |
| *Na+-channel, α-subunit* | |  |  |
| SCN1B | Nav, beta1 | 19500 ± 900 | 80 |
| SCN2B | Nav, beta2 | 25 ± 15 | 0 |
| SCN3B | Nav, beta3 | 3900 ± 670 | 16 |
| SCN4B | Nav, beta4 | 830 ± 210 | 3 |
| *Voltage gated Ca2+-channel* | |  |  |
| CACNA1A | Cav2.1 (PQ) | 980 ± 230 | 5 |
| CACNA1B | Cav2.2 (N) | 600 ± 190 | 3 |
| CACNA1C | Cav1.2 (L) | 380 ± 100 | 2 |
| CACNA1D | Cav1.3 (L) | 5500 ± 1100 | 29 |
| CACNA1E | Cav2.3 (R) | 0 | 0 |
| CACNA1F | Cav1.4 (T) | 20 ± 10 | 0 |
| CACNA1G | Cav3.1 (T) | 130 ± 50 | 1 |
| CACNA1H | Cav3.2 (T) | 10400 ± 1900 | 56 |
| CACNA1I | Cav3.3 (T) | 630 ± 150 | 3 |
| *Large conductance, Ca2+-activated K+-channels, α-subunit* | |  |  |
| KCNMA1 | BKalpha | 21000 ± 5500 | N.A. |
| *Large conductance, Ca2+-activated K+-channels, b-subunits* | |  |  |
| KCNMB1 | BKbeta1 | 50 ± 30 | 1 |
| KCNMB2 | BKbeta2 | 5800 ± 610 | 72 |
| KCNMB3 | BKbeta3 | 1500 ± 240 | 18 |
| KCNMB4 | BKbeta4 | 720 ± 260 | 9 |
| *Voltage gated K+-channel* | |  |  |
| KCNB1 | Kv2.1 | 1300 ± 330 | 26 |
| KCNB2 | Kv2.2 | 3300 ± 770 | 68 |
| KCNC1 | Kv3.1 | 230 ± 60 | 5 |
| KCNC2 | Kv3.2 | 7 ± 3 | 0 |
| KCNG1 | Kv6.1 | 24 ± 6 | 0 |
| KCNG2 | Kv6.2 | 0 | 0 |
| KCNS2 | Kv9.2 | 0 | 0 |
| KCNS3 | Kv9.3 | 8 ± 3 | 0 |
| KCND1 | Kv4.1 | 0 | 0 |
| KCND2 | Kv4.2 | 0 | 0 |
| KCND3 | Kv4.3 | 5 ± 1 | 0 |
| KCNA4 | Kv1.4 | 0 | 0 |

1 Percentage of total expression within each group
